# Supplementary material for: Loss of function Cbl-c mutations in solid tumors
Source: PubMed Central journal article supplement (PMC6602201; doi:10.1371/journal.pone.0219143), 2019-07-01
Supplement: pone.0219143.s003.pdf [file pone.0219143.s003.pdf]

**S2 Table: Cbl-b Mutations by Tumor Type in TCGA**

| Cancer Type                     | N             | Missense   | Truncations | Inframe Indels | Other*   |
|---------------------------------|---------------|------------|-------------|----------------|----------|
| All Sites                       | 27,437        | 180        | 26          | 2              | 2        |
| <b>Hematological</b>            | <b>1,393</b>  | <b>4</b>   | <b>2</b>    | <b>0</b>       | <b>0</b> |
| Lymphoid                        | 1164          | 4          | 2           | 0              | 0        |
| Myeloid                         | 229           | 0          | 0           | 0              | 0        |
| <b>Solid Tumors</b>             | <b>26,044</b> | <b>176</b> | <b>24</b>   | <b>2</b>       | <b>2</b> |
| <b>Aerodigestive</b>            |               |            |             |                |          |
| Head and Neck                   | 827           | 5          | 1           | 0              | 0        |
| Nasopharyngeal                  | 56            | 0          | 0           | 0              | 0        |
| Salivary Gland                  | 214           | 0          | 0           | 0              | 0        |
| Lung (Non-Small Cell)           | 2591          | 36         | 6           | 1              | 0        |
| Lung (Small Cell)               | 190           | 4          | 1           | 0              | 0        |
| Mesothelioma                    | 109           | 0          | 0           | 0              | 0        |
| Esophagus                       | 557           | 4          | 2           | 0              | 0        |
| Stomach                         | 1267          | 4          | 1           | 0              | 0        |
| Liver                           | 983           | 4          | 2           | 0              | 1        |
| ...Ampullary Carcinoma          | 160           | 2          | 1           | 0              | 0        |
| Cholangiocarcinoma              | 91            | 0          | 0           | 0              | 0        |
| Gall Bladder                    | 32            | 0          | 0           | 0              | 0        |
| Pancreas                        | 832           | 3          | 0           | 0              | 0        |
| Colon                           | 1,462         | 23         | 3           | 0              | 0        |
| Brain                           | 3,200         | 0          | 0           | 0              | 0        |
| Breast Cancer                   | 4,110         | 13         | 0           | 0              | 0        |
| <b>Endocrine/Neuroendocrine</b> |               |            |             |                |          |
| Adrenal Cortical                | 92            | 1          | 0           | 0              | 0        |
| Thyroid                         | 516           | 0          | 0           | 0              | 0        |
| Pancreatic Neuroendocrine       | 118           | 0          | 0           | 0              | 0        |
| Pheochromocytoma                | 184           | 0          | 0           | 0              | 0        |
| <b>Genitourinary</b>            |               |            |             |                |          |
| Bladder                         | 705           | 10         | 1           | 0              | 0        |
| Kidney                          | 1,387         | 5          | 1           | 0              | 0        |
| Prostate                        | 2,470         | 5          | 0           | 0              | 0        |
| Testicular                      | 156           | 0          | 0           | 0              | 0        |
| <b>Gynecological</b>            |               |            |             |                |          |
| Ovary                           | 615           | 1          | 0           | 0              | 0        |
| Endometrial                     | 627           | 13         | 3           | 0              | 0        |
| Cervical                        | 309           | 4          | 0           | 0              | 0        |
| <b>Sarcoma</b>                  | <b>732</b>    | <b>3</b>   | <b>0</b>    | <b>0</b>       | <b>0</b> |
| <b>Skin</b>                     |               |            |             |                |          |
| Melanoma                        | 900           | 38         | 2           | 1              | 1        |
| Squamous                        | 29            | 1          | 0           | 0              | 0        |

\*Mutations in splice regions that could cause missplicing
